# Supplementary material
Source: publisher site journal article supplement (https://www.dovepress.com/article/497737)
Supplement: Supplementary file 1 [file get_supplementary_file.php]

Supplementary figure


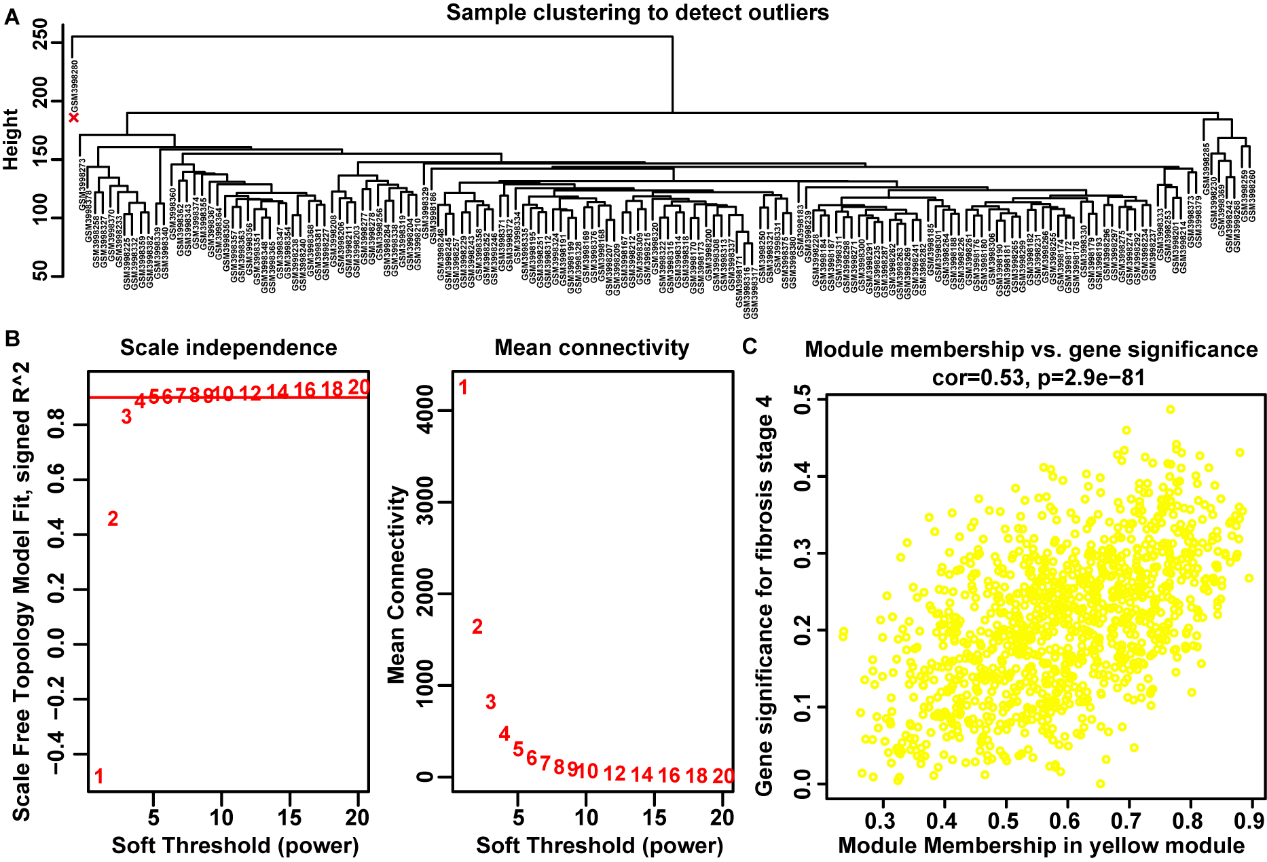


**Figure S1. WGCNA analysis of the GSE135251 dataset. (A)** Sample clustering of WGCNA to detect abnormal samples. **(B)** Selection of soft-thresholding power. The left panel displayed the change of the fitting index of different soft-thresholding powers; the right panel displayed the mean connectivity corresponding to different soft-thresholding powers. **(C)**Scatterplot of gene significance for NASH fibrosis stage 4 vs. module membership in the yellow module.
